# Supplementary material
Source: PubMed Central journal article supplement (PMC6606360)
Supplement: NIHMS1529915-supplement-2.pdf [file NIHMS1529915-supplement-2.pdf]

# Supplementary Figure 2

**A**

miR-450a-5p: 5'UUUUGCGAUGUGUUCUAAUAU 3'  
 miR-450b-5p: 5'UUUUGCAUAUGUUCUGAAUA 3'

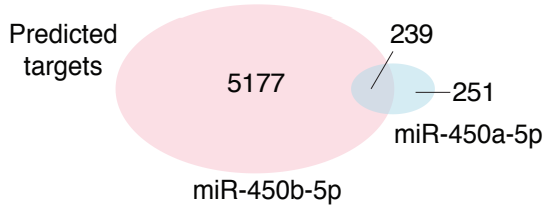

**C**

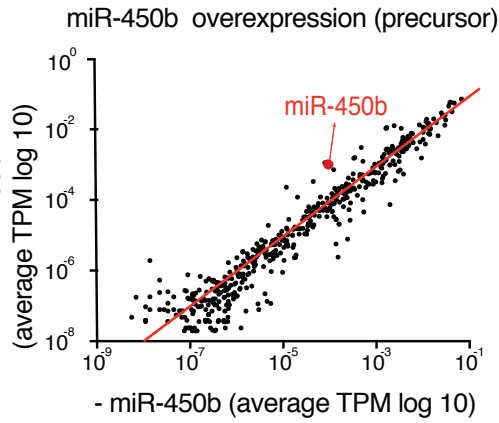

**B**

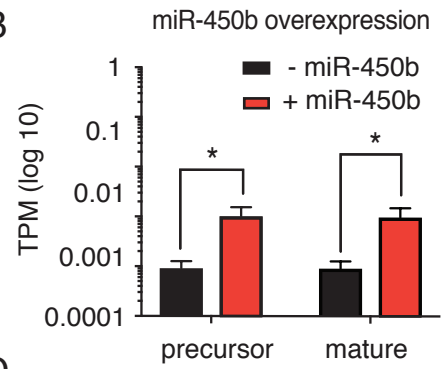

**D**

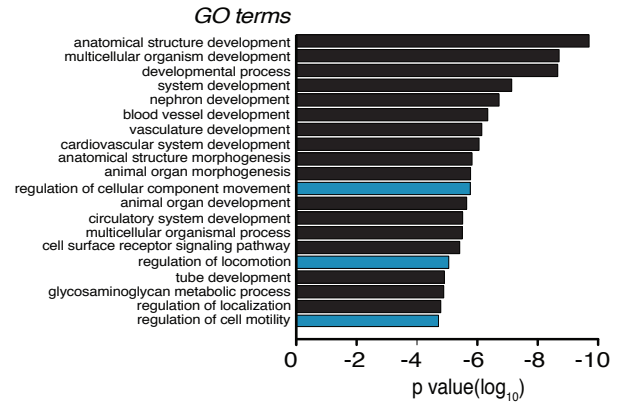

**E**

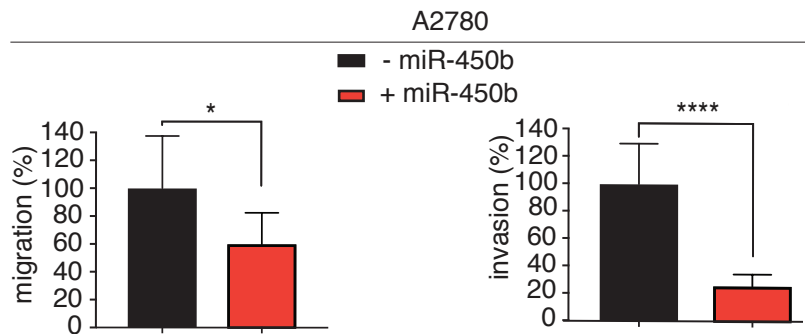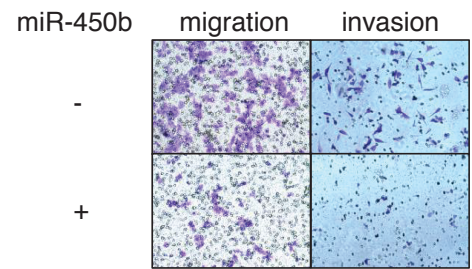

**F**

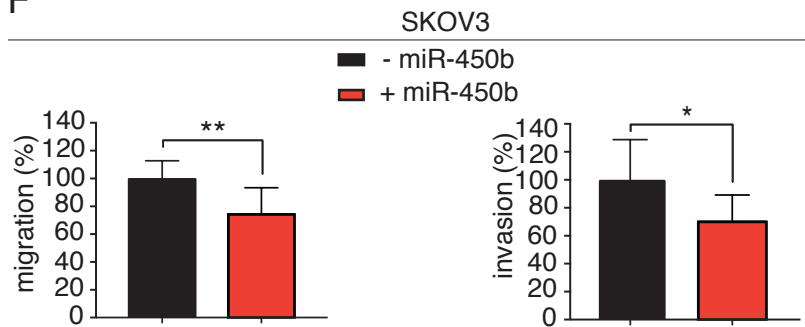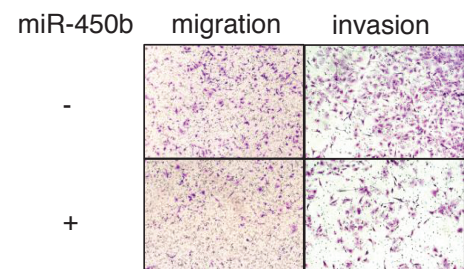

**G**

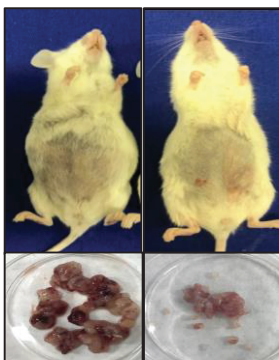

**H**

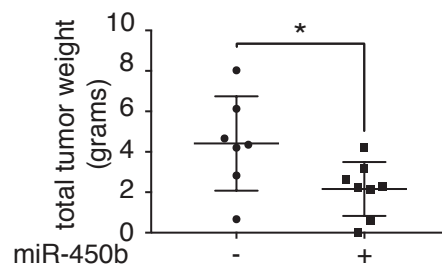

miR-450b - +
