# Supplementary material
Source: PubMed Central journal article supplement (PMC6606360)

Supplementary Figure 1

A

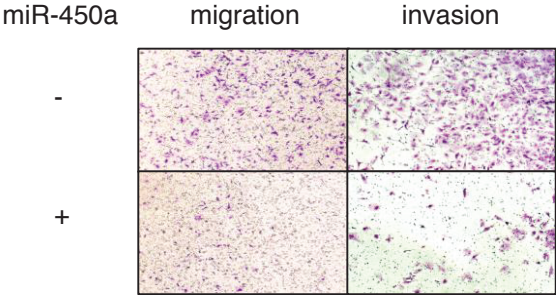

B

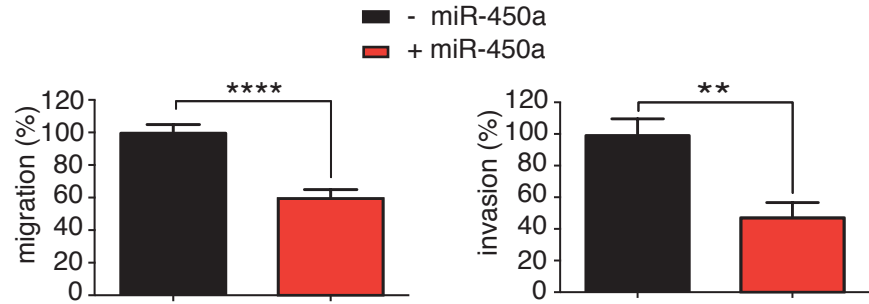

C

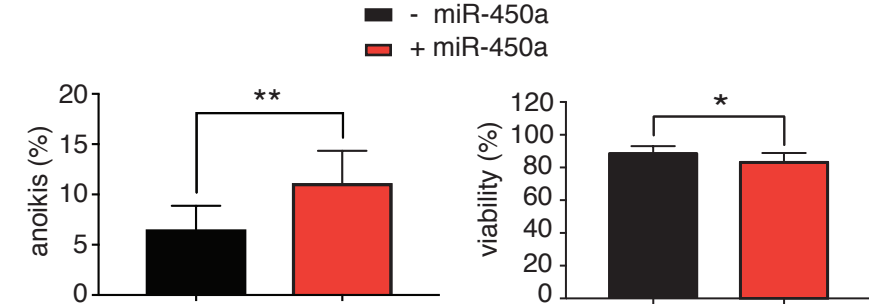

Supplement: NIHMS1529915-supplement-1.pdf [file NIHMS1529915-supplement-1.pdf]

Supplementary Figure 3

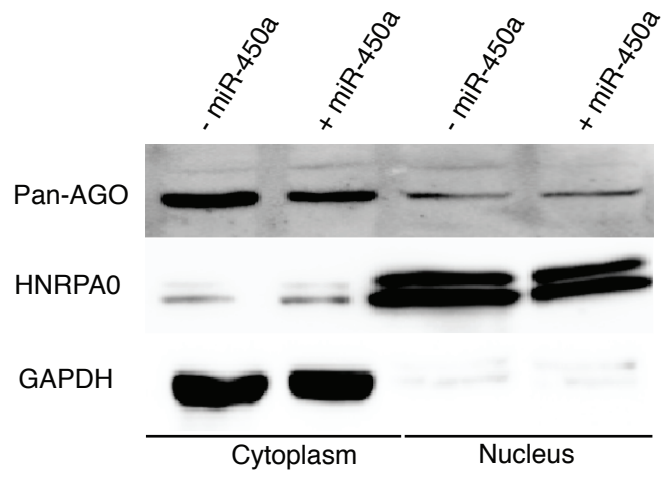

Supplement: NIHMS1529915-supplement-3.pdf [file NIHMS1529915-supplement-3.pdf]

## Supplementary Figure 4

A

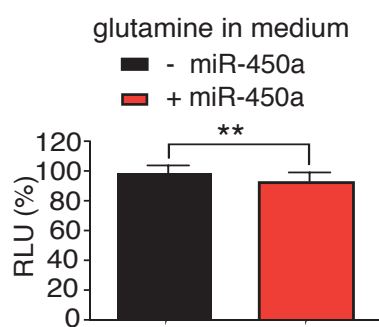

B

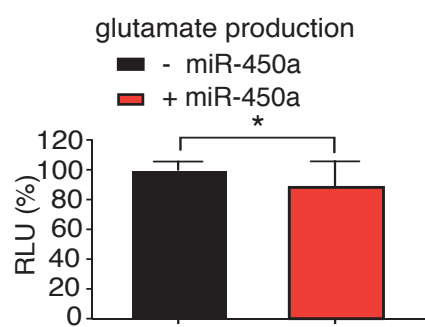

Supplement: NIHMS1529915-supplement-4.pdf [file NIHMS1529915-supplement-4.pdf]
